# Supplementary material
Source: MDPI journal article supplement (https://www.mdpi.com/2076-3298/8/11/124)
Supplement: s1 [file s1]

## Article

# Adsorption of Polycyclic Aromatic Hydrocarbons by Natural, Synthetic and Modified Clays

Sara Satouh <sup>1</sup>, Julia Martín <sup>2,\*</sup>, María del Mar Orta <sup>3</sup>, Santiago Medina-Carrasco <sup>4</sup>, Nabil Messikh <sup>5</sup>, Nabil Bougdah <sup>1,5</sup>, Juan Luis Santos <sup>2</sup>, Irene Aparicio <sup>2</sup> and Esteban Alonso <sup>2</sup>

<sup>1</sup> Laboratory LRPCSI, University 20 August 1955, Skikda 21000, Algeria; satouhsara14@gmail.com (S.S.); bougdah\_nabil@yahoo.fr (N.B.)

<sup>2</sup> Departamento de Química Analítica, Escuela Politécnica Superior, Universidad de Sevilla, C/Virgen de África 7, E-41011 Sevilla, Spain; jlsantos@us.es (J.L.S.); iaparcio@us.es (I.A.); ealonso@us.es (E.A.)

<sup>3</sup> Departamento de Química Analítica, Facultad de Farmacia, Universidad de Sevilla, C/Profesor García González 2, 41012 Sevilla, Spain; enmaorta@us.es

<sup>4</sup> Laboratorio de Rayos-X (CITIUS), Universidad de Sevilla, Avenida Reina Mercedes 4B, 41012 Sevilla, Spain; sanmedi@us.es

<sup>5</sup> Department of Petrochemistry and Process Engineering, Faculty of Technology, University 20 August 1955, Skikda 21000, Algeria; nbchem@yahoo.com

\* Correspondence: jbueno@us.es

## Supplementary Materials

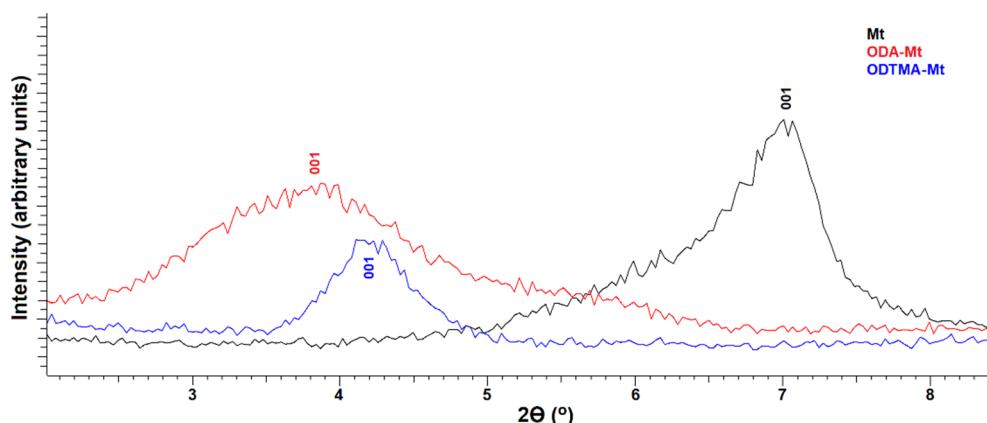

**Figure S1.** XRD results for the 001 reflections of the samples Mt (black line), ODA-Mt (red line) and ODTMA-Mt (blue line).

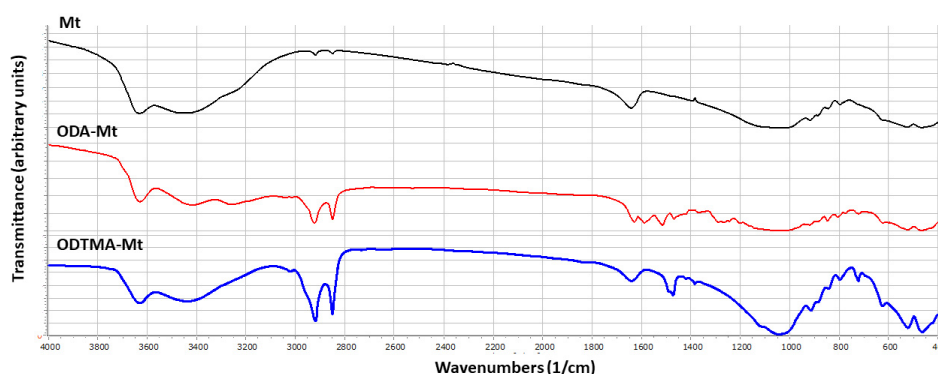

**Figure S2.** FT-IR transmittance spectra of Mt, ODA-Mt and ODTMA-Mt in 4000–400 cm<sup>−1</sup> regions.

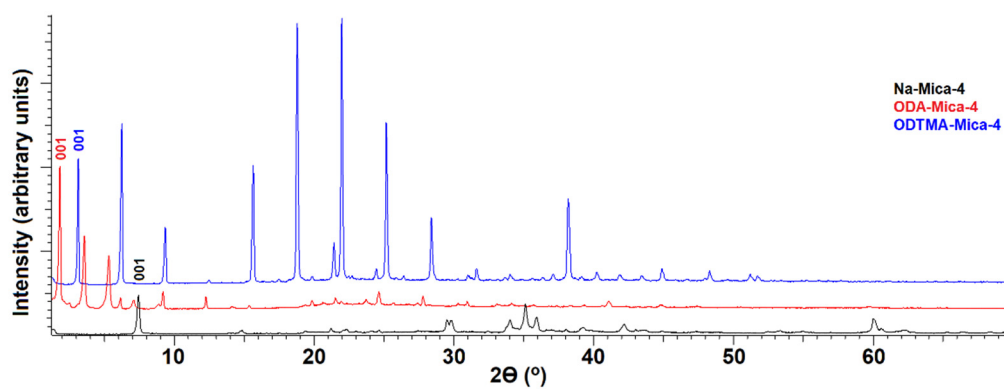

Figure S3. XRD results for the samples Na-Mica-4 (black line), ODA- Mica-4 (red line) and ODTMA- Mica-4 (blue line).

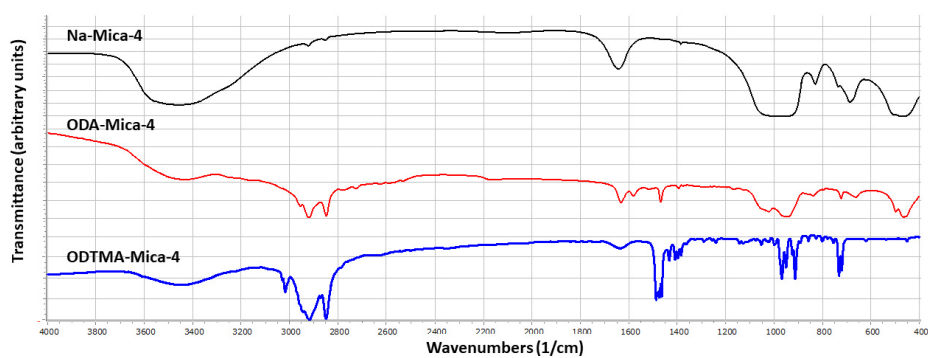

Figure S4. FT-IR transmittance spectra of Na-Mica-4, ODA-Mica-4 and ODTMA-Mica-4 in 4000–400 cm<sup>-1</sup> regions.
